# Supplementary material for: Suppressive Effect of Bioactive Extracts of Bacillus sp. H8-1 and Bacillus sp. K203 on Tomato Wilt Caused by Clavibacter michiganensis subsp. michiganensis
Source: MDPI journal article supplement (doi:10.3390/microorganisms10020403), 2022-02-09
Supplement: s1 [file s1]

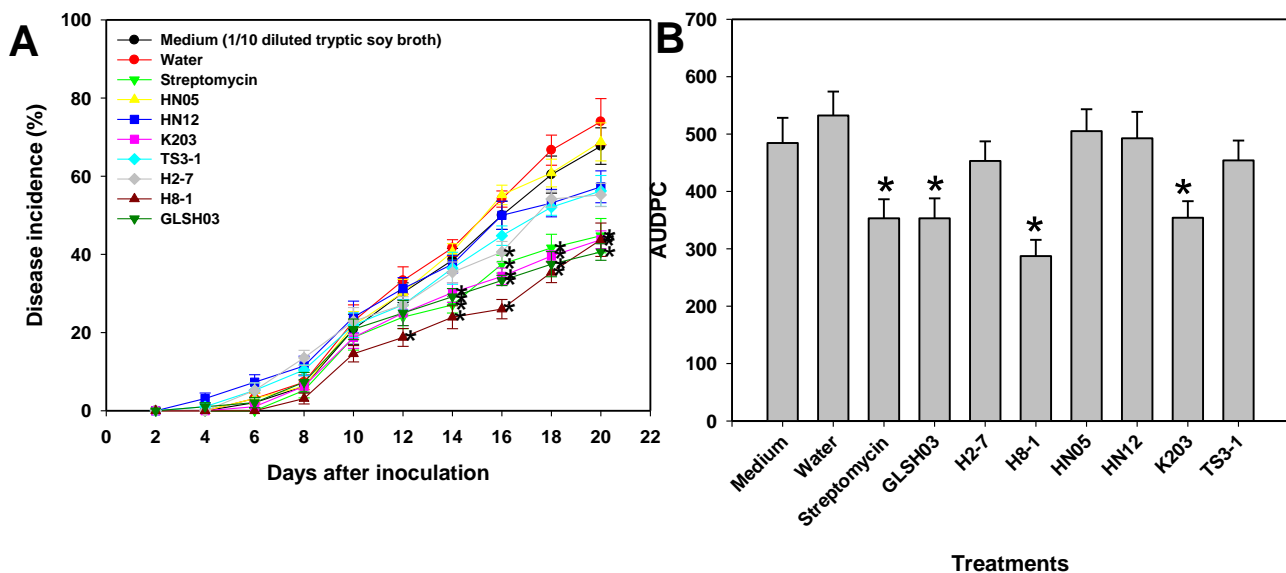

**Figure S1.** Disease incidence (A) and AUDPC (B) caused by *Clavibacter michiganensis* subsp. *michiganensis* (*Cmm*) in tomato plant. The bacterial supernatants and *Cmm* suspension were treated into pots. An asterisk on the bar mean statistical difference compared to medium by LSD ( $P < 0.05$ ) and error bars indicate standard errors (three replicates of 8 plants per treatment).

**A**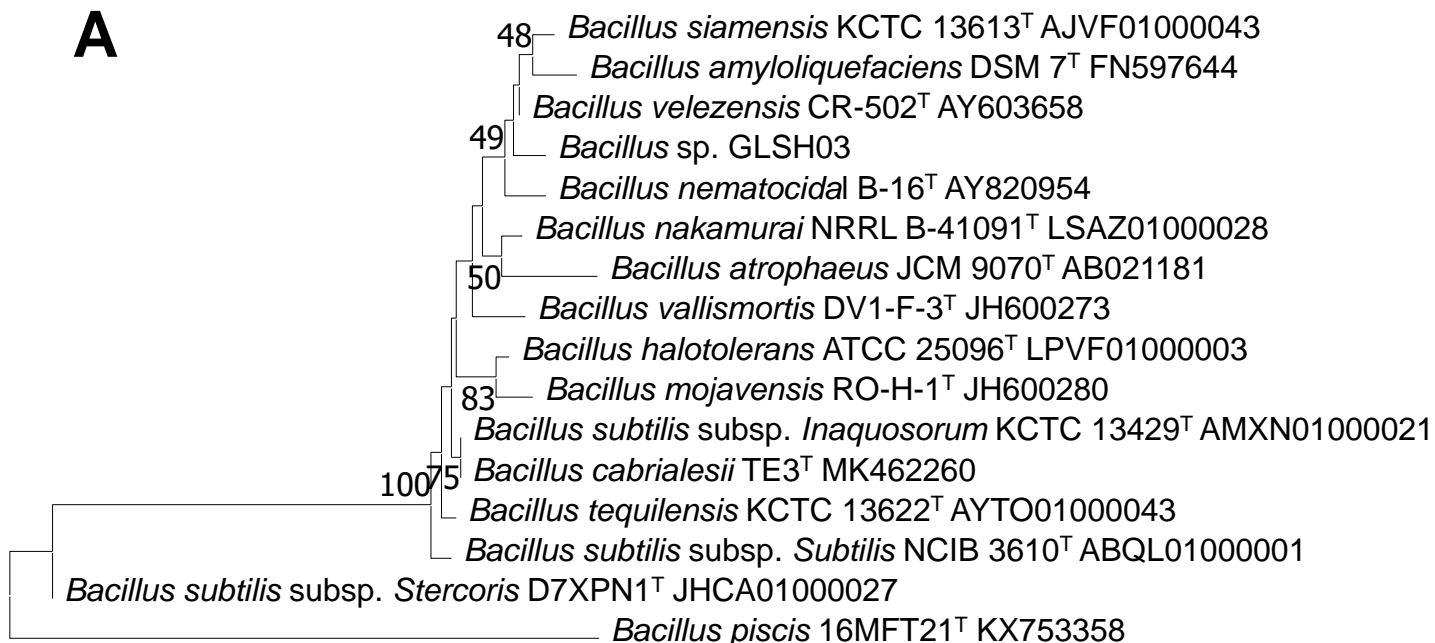

0.0050

**B**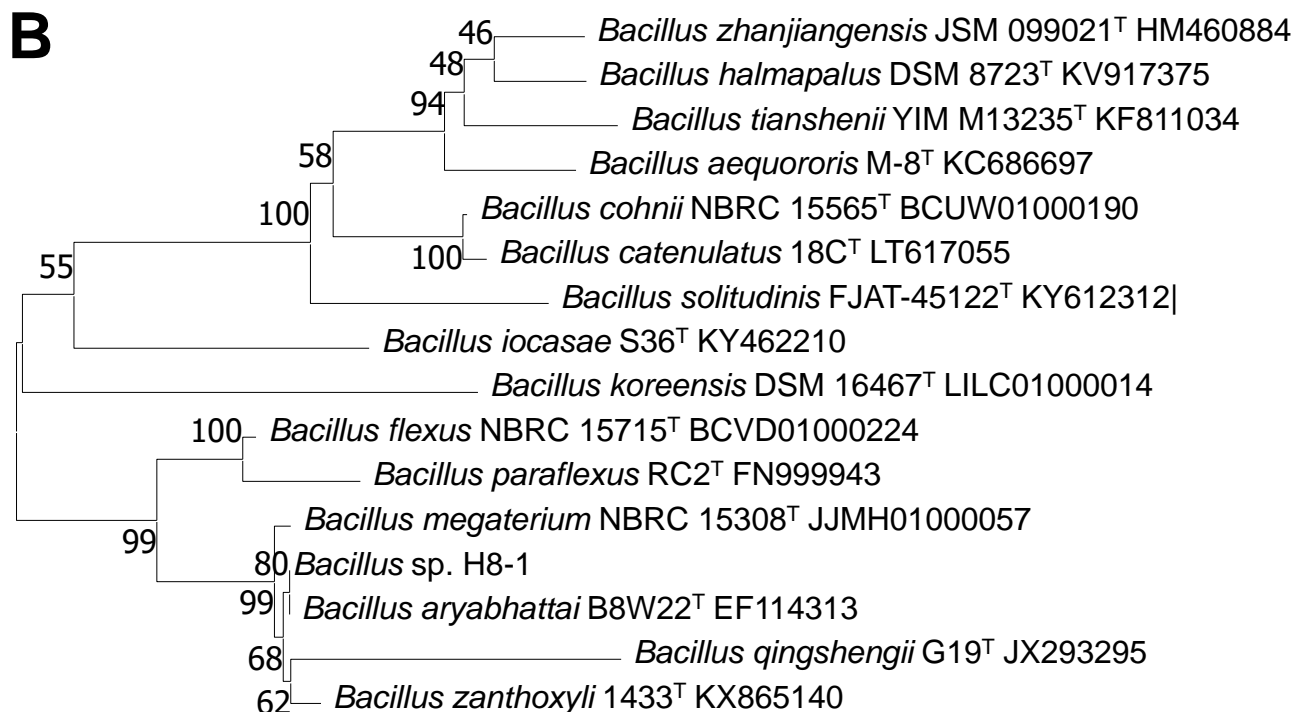

0.0050

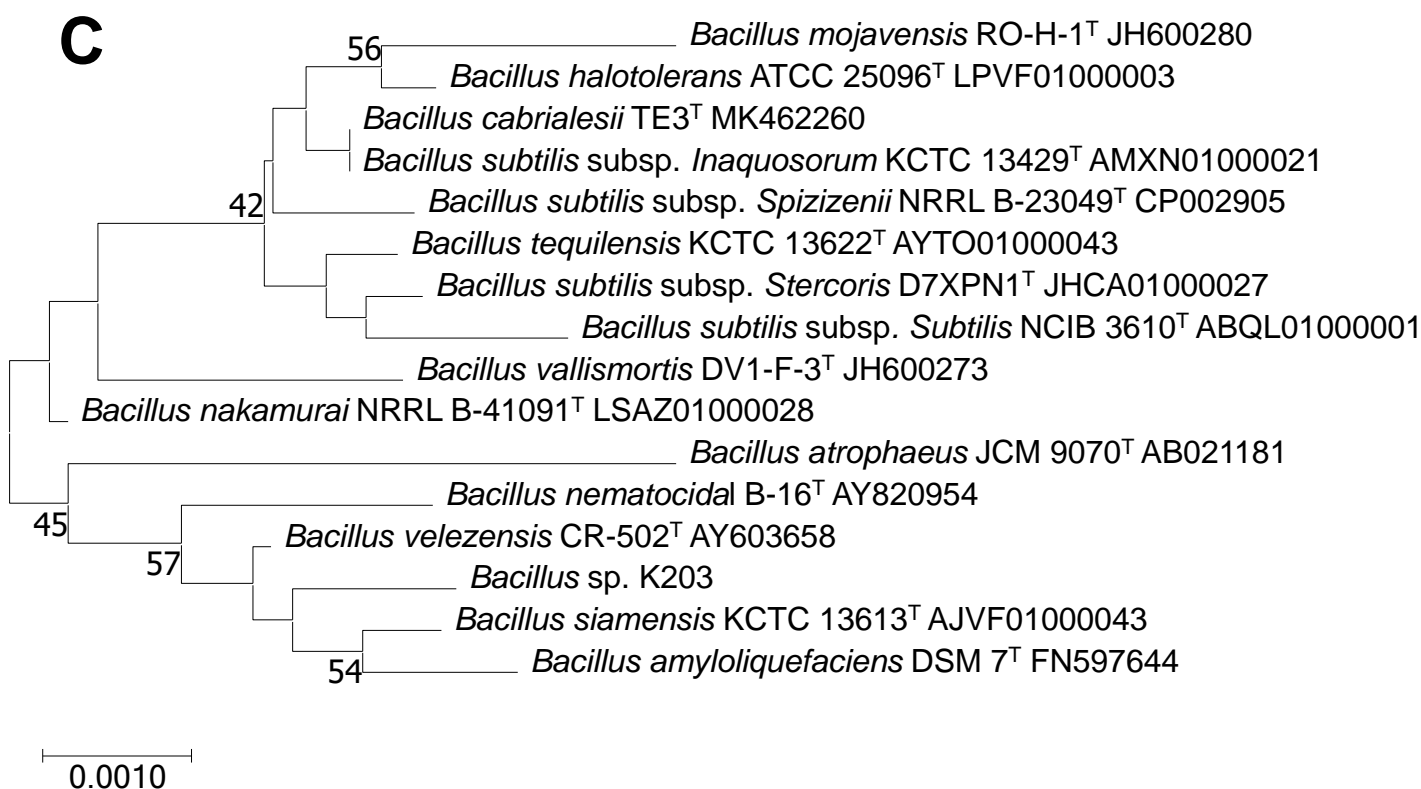

**Figure S2.** Phylogenetic trees composed by neighbor-joining method based on 16S rRNA sequences of strains GLSH03 (A), H8-1 (B), K203(C) Bootstrap values based on 1,000 replications are shown at the branch points.

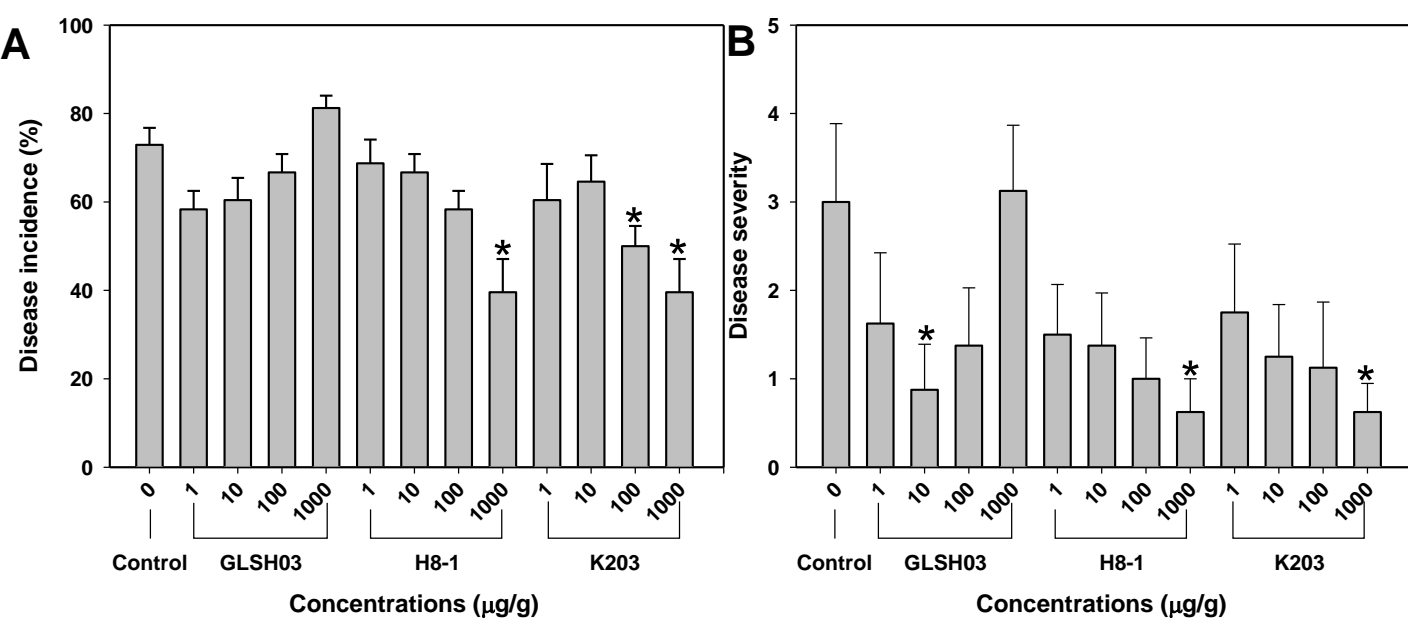

**Figure S3.** Disease incidence (A) and severity (B) caused by *Clavibacter michiganensis* subsp. *michiganensis* (*Cmm*) in tomato plant. The mixtures of filtered water extracts and *Cmm* suspension were treated into pots (final concentration : Water extract, 1, 10, 100 and 1,000 µl/g of soil, *Cmm*,  $10^9$  cfu/g of soil). An asterisk on the bar mean statistical difference compared to control by LSD ( $P < 0.05$ ) and error bars indicate standard errors (three replicates of 8 plants per treatment).

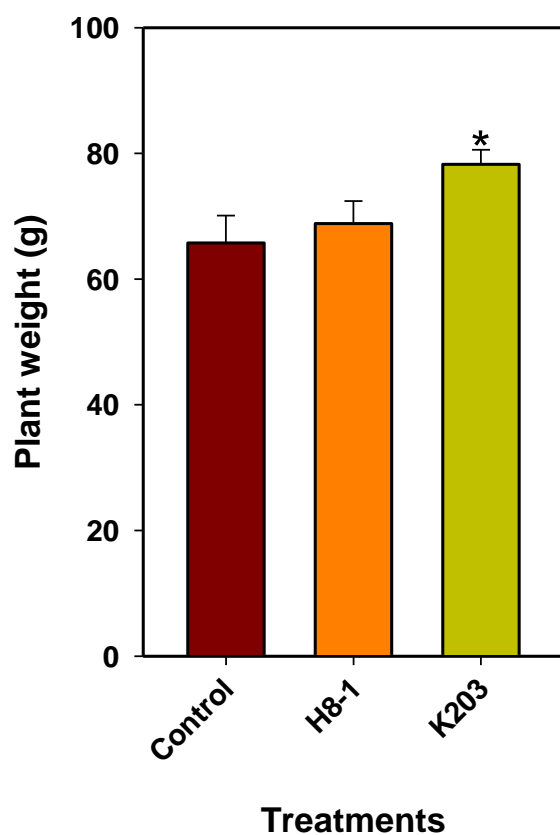

**Figure S4.** Shoot weight (g plant<sup>-1</sup>) after treatment of the bacterial water extract. An asterisk on the bar mean statistical difference by LSD ( $P < 0.05$ ) and error bars indicate standard errors (three replicates of 8 plants per treatment).

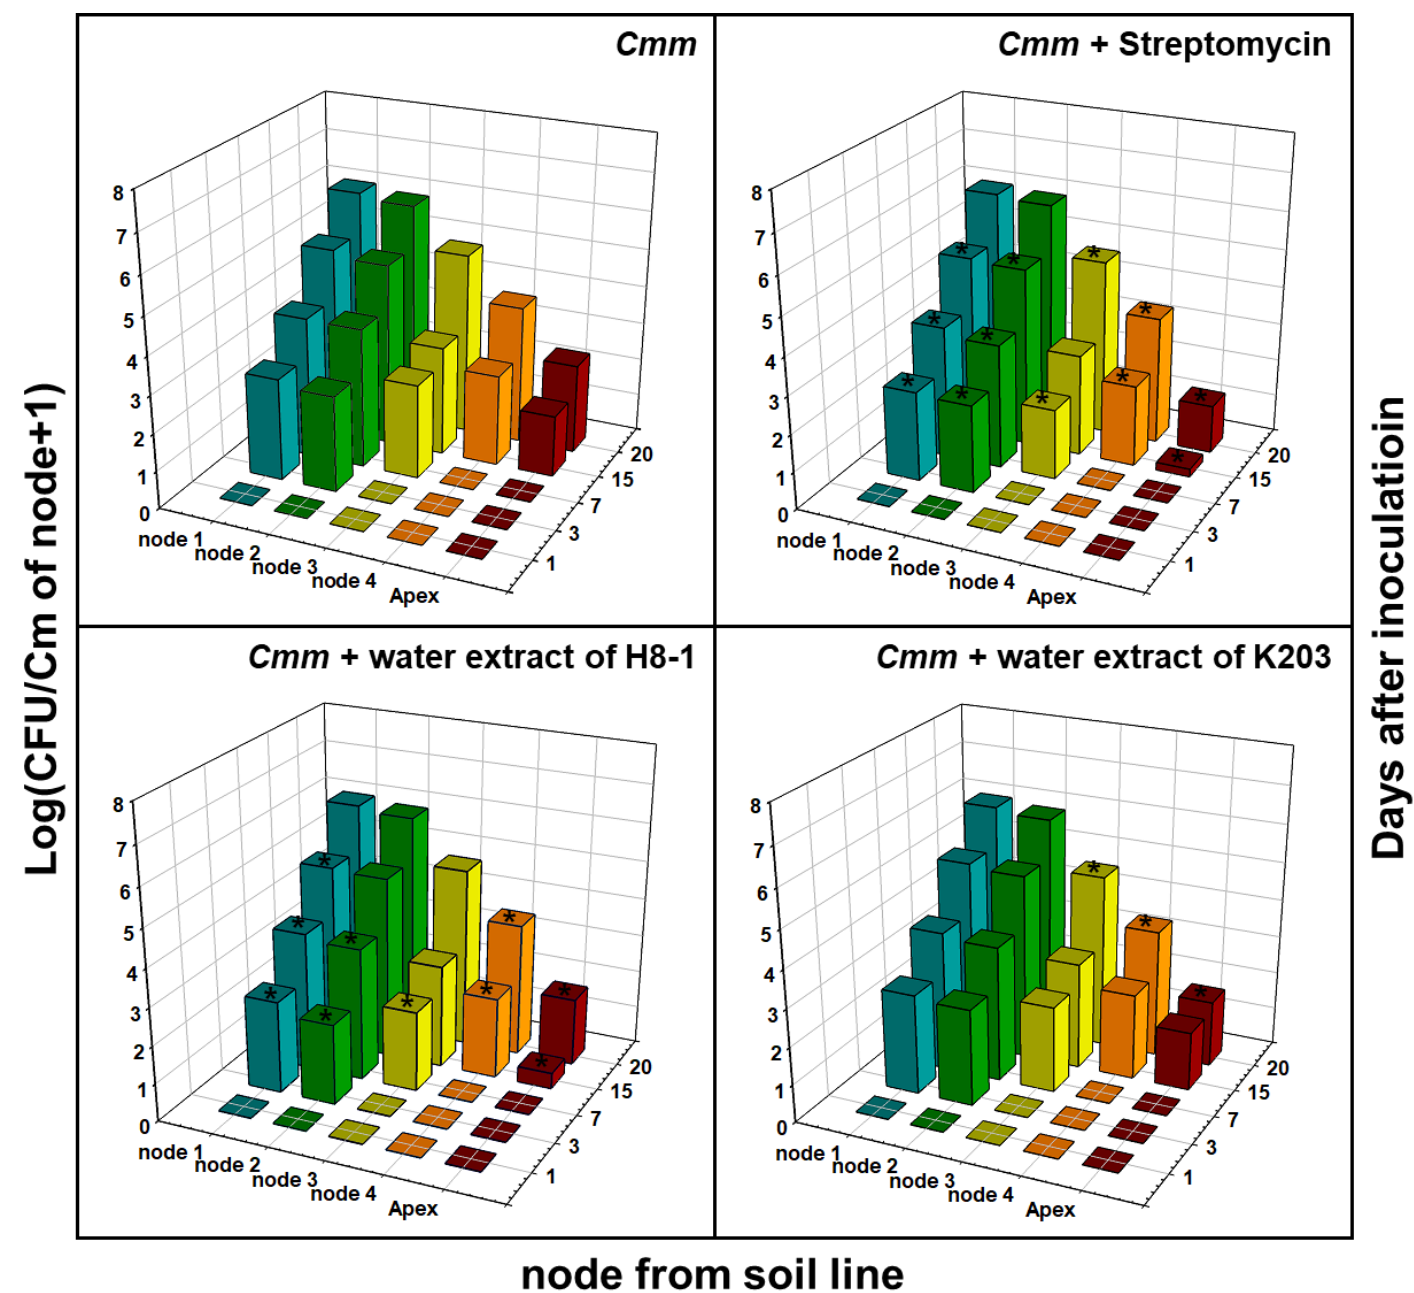

**Figure S5.** Colonization of *Clavibacter michiganensis* subsp. *michiganensis* (Cmm) in tomato plants. Stem segments were homogenized, and cultured on bacterial canker of tomato (BCT) mediums. An asterisk on the bar means significant statistical difference compared to control by LSD ( $P < 0.05$ ) ( $n=10$ ).

**Table S1.** API 50CH tests of strains K203, H8-1 and GLSH03 at 24 hours

| Component                | K203 | H8-1 | GLSH03 |
|--------------------------|------|------|--------|
| control                  |      |      |        |
| glycerol                 | ±    | ±    | ±      |
| erythritol               | ±    | -    | -      |
| D-arabinose              | -    | -    | -      |
| L-arabinose              | ±    | ±    | ±      |
| D-ribose                 | -    | ±    | ±      |
| D-xylose                 | ±    | -    | ±      |
| L-xylose                 | -    | -    | -      |
| D-adonitol               | ±    | -    | -      |
| methyl-BD-xylopyranoside | -    | -    | -      |
| D-galactose              | -    | ±    | -      |
| D-glucose                | +    | +    | +      |
| D-fructose               | +    | +    | +      |
| D-mannose                | +    | -    | +      |
| L-sorbose                | -    | -    | ±      |
| rhamnose                 | -    | -    | ±      |
| dulcitol                 | -    | ±    | ±      |
| inositol                 | ±    | ±    | +      |
| mannitol                 | ±    | +    | +      |
| sorbitol                 | ±    | -    | +      |
| α-methyl-D-mannoside     | -    | -    | -      |
| α-methyl-D-glucoside     | ±    | -    | +      |
| N-acetyl-glucosamine     | ±    | ±    | +      |
| amygdalin                | ±    | +    | +      |
| arbutin                  | ±    | ±    | +      |
| esculin                  | +    | ±    | +      |
| salicin                  | ±    | +    | +      |
| cellobiose               | +    | ±    | +      |
| maltose                  | ±    | ±    | +      |
| lactose                  | ±    | +    | ±      |
| melibiose                | -    | ±    | +      |
| sucrose                  | +    | +    | +      |
| trehalose                | ±    | +    | -      |
| inulin                   | ±    | +    | -      |
| melezitose               | ±    | -    | +      |
| raffinose                | ±    | +    | +      |
| starch                   | ±    | +    | +      |
| glycogen                 | ±    | +    | ±      |
| xylitol                  | -    | +    | +      |
| gentiobiose              | ±    | -    | ±      |
| D-turanose               | -    | +    | ±      |
| D-lyxose                 | -    | ±    | ±      |
| D-tagatose               | -    | -    | ±      |
| D-fucose                 | -    | -    | ±      |
| L-fucose                 | -    | -    | ±      |
| D-arabitol               | -    | -    | ±      |
| L-arabitol               | -    | -    | ±      |
| gluconate                | -    | -    | ±      |
| 2-keto-gluconate         | -    | -    | ±      |
| 5-keto-gluconate         | -    | -    | ±      |

+, Positive; ±, intermediate; -, negative reactions

**Table S2.** API ZYM tests of strains K203, H8-1 and GLSH03 at 4H

| Enzyme                                | Substrate                                     | PH  | K203 | H8-1 | GLSH03 |
|---------------------------------------|-----------------------------------------------|-----|------|------|--------|
| Alkaline phosphatase                  | 2-naphthyl phosphate                          | 8.5 | -    | -    | +      |
| Esterase (C4)                         | 2-naphthyl butyrate                           | 6.5 | +    | +    | +      |
| Esterase Lipase (C8)                  | 2-naphthyl caprylate                          | 7.5 | +    | +    | +      |
| Lipase (C14)                          | 2-naphthyl myristate                          | 7.5 | -    | -    | -      |
| Leucine arylamidase                   | L-leucyl-2-naphthylamide                      | 7.5 | -    | -    | -      |
| Valine arylamidase                    | L-valyl-2-naphthylamide                       | 7.5 | -    | -    | -      |
| Crystine arylamidase                  | L-cystyl-2-naphthylamide                      | 7.5 | -    | -    | -      |
| Trypsin                               | N-benzoyl-DL-arginine-2-naphthylamide         | 8.5 | -    | -    | -      |
| $\alpha$ -chymotrypsin                | N-glutaryl-phenylalanine-2-naphthylamide      | 7.5 | -    | -    | -      |
| Acid phosphatase                      | 2-naphtyl phosphate                           | 5.4 | -    | +    | -      |
| Naphtol-AS-BI-phosphohydrolase        | Naphtol-AS-BI-phosphate                       | 5.4 | -    | +    | +      |
| $\alpha$ - galactosidase              | 6-Br-2-naphthyl- $\alpha$ D-galactopyranoside | 5.4 | -    | +    | -      |
| $\beta$ - galactosidase               | 2-naphthyl- $\beta$ D-galactopyranoside       | 5.4 | -    | +    | -      |
| $\beta$ - glucuronidase               | Naphtol-AS-BI- $\beta$ D-glucuronide          | 5.4 | -    | -    | -      |
| $\alpha$ - glucosidase                | 2-naphthyl- $\alpha$ D-glucopyranoside        | 5.4 | -    | -    | -      |
| $\beta$ - glucosidase                 | 6-Br-2-naphthyl- $\beta$ D-glucopyranoside    | 5.4 | -    | -    | -      |
| N -acetyl - $\beta$ - glucosaminidase | 1-naphthyl-N-acetyl- $\beta$ D-glucosaminide  | 5.4 | -    | -    | -      |
| $\alpha$ - mannosidase                | 6-Br-2-naphthyl- $\alpha$ D-mannopyranoside   | 5.4 | -    | -    | -      |
| $\alpha$ - fucosidase                 | 2-naphthyl- $\alpha$ L-fucopyranoside         | 5.4 | -    | -    | -      |

+, Positive; -, negative reactions
